# Supplementary material for: Negative and Positive Bias for Emotional Faces: Evidence from the Attention and Working Memory Paradigms
Source: PubMed Central journal article supplement (PMC8178010; doi:10.1155/2021/8851066), 2021-05-27
Supplement: 8851066.f1.pdf [file 8851066.f1.pdf]

## **Supplementary Material**

### **Negative and Positive Bias for Emotional Faces: Evidence from the Attention and Working Memory Paradigms**

Qianru Xu<sup>1,2</sup>, Chaoxiong Ye<sup>1,2\*</sup>, Simeng Gu<sup>1,3</sup>, Zhonghua Hu<sup>1</sup>, Yi Lei<sup>1</sup>, Xueyan Li<sup>4</sup>, Lihui Huang<sup>5</sup>, Qiang Liu<sup>1</sup>

1 Institute of Brain and Psychological Sciences, Sichuan Normal University, Chengdu, China;

2 Department of Psychology, University of Jyväskylä, Jyväskylä, Finland;

3 Department of Medical Psychology, Medical School in Jiangsu University, Zhenjiang, China;

4 School of Foreign Languages, Dalian University of Technology, Dalian, China;

5 Faculty of Education, Sichuan Normal University, Chengdu, China;

#### **\* Correspondence to:**

Chaoxiong Ye, Ph.D.

Institute of Brain and Psychological Sciences,

Sichuan Normal University, Chengdu, 610000, China

Email: cxye1988@163.com

# Paradigms and Measures Used in Visual Search and Change

## Detection Paradigm

The visual search paradigm (also called the “face in the crowd paradigm” when using faces as stimuli) mimics the process of detecting target objects or people from multifarious information of everyday lives [1,2]. In a classic visual search paradigm experiment (see Figure 1 in the main text), each trial contained a face array, and half of the trials contained a target stimulus (i.e., one face showed different expressions than the other faces) while the other half of the trials did not contain a target stimulus (i.e., all the faces showed the same expression). Participants are asked to detect whether a face presented different expressions from the other faces. For the analysis of results, the reaction time (RT), accuracy rate (ACC), error rate, and search slope (the function of RT and set size) are behavioral indices to evaluate participants’ efficiency in detecting the search target. The shallower the search slope of a target stimulus, the more efficient the search. Moreover, the search slope can also indicate whether the processing method uses a parallel or serial search approach [2]. In addition to the behavioral index, Luck and Hillyard [3] found an event-related potentials (ERPs) component called N2-posterior-contralateral (N2pc) which has been commonly used by recent studies as an indicator to track the visual selective attention process. N2pc is mainly distributed in the posterior-contralateral electrodes, appearing 200–300 ms after stimulus presentation (for a review, see [4]). The latency of the N2pc indicates the time point at which attention focused on the target item, while amplitude can reflect the amount of attention on the target [4,5]. Additionally, several other ERP components—such as N170, early posterior negativity (EPN), and late positive potential (LPP)—have usually been used to indicate emotional processing in visual attention tasks (for a review, see [6]).

VWM research on emotional bias has widely used the change detection paradigm. This paradigm (also called the “visual short-term memory task” [see [7]] or the “match-to-sample probe recognition task” [see [8]]) generally comprises four parts: pre-stimulus fixation, memory array, retention interval, and probe array (see Figure 2 in the main text). Typically, in half of the related trials, the probe array and memory array are exactly the same, and in the other half of the trials, one of the memory items in the probe array differs from the memory array, and the participant’s task is to detect whether or not a change has occurred. Generally, the change detection paradigm asks participants to temporarily store the memory array across a blank delay period and then compare the memory array with the probe array. Accuracy, Cowan’s  $K^1$  [9], and  $d'^2$  [10], are common behavioral indicators in the change detection paradigm. Cowan’s  $K$  is often used to measure individuals’ VWM capacity. It is an estimated index of the number of items successfully stored in an individual’s VWM. Meanwhile,  $d'$  is an index of VWM performance. It is obtained from the signal detection theory, representing the distance between the z-transforms of the hit rate and false alarm rate [10]. Also, researchers have identified an ERP component called

---

<sup>1</sup>  $K = set\ size \times (hit\ rate - false\ alarm\ rate)$ .

<sup>2</sup>  $d' = Z(hit\ rate) - Z(false\ alarm\ rate)$ .

“contralateral delay activity” (CDA, also known as “sustained posterior contralateral negativity,” SPCN; [11]) as a neural indicator of VWM maintenance. The CDA’s amplitude increases with the number of items in an individual’s VWM during the maintenance of memory material, and it reaches an asymptote once approximately three to four simple objects have been stored, reflecting the limitation of an individual’s VWM capacity [12]. In addition, N170, N250 (which usually reflects the repetition effect) and P3b (the subcomponent of P300, which is sensitive to the resource allocation process) have also been suggested to relate with VWM emotional processing (e.g., [13,14]).

**Supplementary Table 1: Studies on emotional face in visual working memory (VWM) by using change detection paradigm.**

| Study <sup>a</sup>               | N  | Expression                                                                         | Stimulus type/<br>Stimulus set <sup>b</sup> | Stimulus arousal | Set size | Encoding time (ms) | Task <sup>d</sup>                 | Behavior /Neural index                           | Results <sup>e</sup>                           | Comments                                      |
|----------------------------------|----|------------------------------------------------------------------------------------|---------------------------------------------|------------------|----------|--------------------|-----------------------------------|--------------------------------------------------|------------------------------------------------|-----------------------------------------------|
| Becker et al. (2014)[15]: Exp. 1 | 64 | Neutral, angry                                                                     | Photograph /- <sup>c</sup>                  | -                | 4        | 10000              | Detect identity present/ absent   | Hit rate, false alarm rate, <i>d'</i> , bias (c) | Angry > neutral                                | Test gender effect                            |
| Brenner et al. (2014)[16]        | 29 | Positive (very happy, somewhat happy), neutral, Negative (sad, fearful, and angry) | Photograph /NimStim                         | -                | 1        | 200                | Detect expression same/ different | Acc, RT, P100, N170, N250, theta power           | Negative > positive                            |                                               |
| Curby et al. (2019)[8]: Exp. 1   | 40 | Fearful, neutral                                                                   | Photograph /NimStim, KDEF, CVL              | -                | 5        | 1000/4000          | Detect probe same/ different      | K                                                | 1000 ms: no effect; 4000 ms: fearful < neutral |                                               |
| Curby et al. (2019)[8]: Exp. 2   | 41 | Fearful, neutral                                                                   | Photograph /NimStim, KDEF, CVL              | -                | 5        | 1000/4000          | Detect probe same/ different      | K                                                | 1000 ms: no effect; 4000 ms: fearful < neutral | Also test inverted face                       |
| Curby et al. (2019)[8]: Exp. 3   | 82 | Fearful, neutral                                                                   | Photograph /NimStim, KDEF, CVL              | -                | 2,4,6    | 4000               | Detect probe same/ different      | K                                                | Fearful < neutral                              | Test emotional state, and attentional control |

| Study <sup>a</sup>               | N  | Expression                     | Stimulus type/<br>Stimulus set <sup>b</sup> | Stimulus arousal                                | Set size | Encoding time (ms) | Task <sup>d</sup>               | Behavior /Neural index               | Results <sup>e</sup>           | Comments                                                                       |
|----------------------------------|----|--------------------------------|---------------------------------------------|-------------------------------------------------|----------|--------------------|---------------------------------|--------------------------------------|--------------------------------|--------------------------------------------------------------------------------|
| Curby et al. (2019)[8]: Exp. 4a  | 42 | Neutral, happy, fearful, angry | Photograph /Radboud                         | Happy = fearful; fearful ≠ angry; happy ≠ angry | 5        | 4000               | Detect probe same/ different    | K                                    | Fearful, angry < happy         |                                                                                |
| Jackson et al. (2008)[17]        | 35 | Angry, happy, neutral          | Photograph /Ekman & Friesen                 | Happy = angry                                   | 1,2,3,4  | 2000               | Detect identity present/ absent | <i>d'</i> , fMRI                     | Angry > happy; angry > neutral | Emotion effect showed on rSTS, rPFC (IFS), and rGPi                            |
| Jackson et al. (2009)[7]: Exp. 1 | 24 | Angry, happy, neutral          | Photograph /Ekman & Friesen                 | -                                               | 1,2,3,4  | 2000               | Detect identity present/ absent | <i>d'</i> , K-iterative ( $K_{it}$ ) | Angry > happy; angry > neutral |                                                                                |
| Jackson et al. (2009)[7]: Exp. 2 | 18 | Angry, happy, neutral          | Photograph /Ekman & Friesen                 | Angry = happy                                   | 2,4      | 2000               | Detect identity present/ absent | <i>d'</i> , K-iterative ( $K_{it}$ ) | Angry > happy; angry > neutral | High or low-arousal music was played during the experiment                     |
| Jackson et al. (2009)[7]: Exp. 3 | 26 | Angry, neutral                 | Photograph /Ekman & Friesen                 | -                                               | 2,4      | 4000               | Detect identity present/ absent | <i>d'</i> , K-iterative ( $K_{it}$ ) | Angry > neutral                |                                                                                |
| Jackson et al. (2009)[7]: Exp. 5 | 40 | Angry, happy, neutral          | Photograph /Ekman & Friesen, KDEF           | Morphed to the same intensity                   | 2,4      | 2000               | Detect identity present/ absent | <i>d'</i> , K-iterative ( $K_{it}$ ) | Angry > happy; angry > neutral | 16 participants performed with Ekman face set, 24 performed with KDEF face set |

| Study <sup>a</sup>                | N  | Expression            | Stimulus type/<br>Stimulus set <sup>b</sup> | Stimulus arousal | Set size | Encoding time (ms) | Task <sup>d</sup>               | Behavior /Neural index            | Results <sup>e</sup>                                                                                       | Comments                                                            |
|-----------------------------------|----|-----------------------|---------------------------------------------|------------------|----------|--------------------|---------------------------------|-----------------------------------|------------------------------------------------------------------------------------------------------------|---------------------------------------------------------------------|
| Jackson et al. (2012)[18]: Exp. 1 | 25 | Angry, happy          | Photograph /Ekman & Friesen                 | -                | 2        | 2000               | Detect identity present/ absent | $d'$ , RT                         | Angry = happy                                                                                              | Intervening neutral words vs. no words during maintenance           |
| Jackson et al. (2012)[18]: Exp. 2 | 27 | Angry, happy          | Photograph /Ekman & Friesen                 | -                | 2        | 2000               | Detect identity present/ absent | $d'$ , RT                         | Angry face was boosted by intervened emotional word, but happy face was not affected by it                 | Intervening negative, positive, or neutral words during maintenance |
| Jackson et al. (2014)[19]: Exp. 1 | 22 | Angry, happy          | Photograph /Ekman & Friesen                 | Angry= happy     | 1,2,3,4  | 2000               | Detect identity present/ absent | Hits, false alarm rate, $d'$ , RT | Angry > happy                                                                                              | Emotional faces presented at encoding phase.                        |
| Jackson et al. (2014)[19]: Exp. 2 | 13 | Angry, happy          | Photograph /Ekman & Friesen                 | Angry= happy     | 1,2,3,4  | 2000               | Detect identity present/ absent | Hits, false alarm rate, $d'$ , RT | Angry = happy                                                                                              | Emotional faces presented at retrieval phase                        |
| Jackson et al. (2014)[19]: Exp. 3 | 25 | Angry, happy          | Photograph /Ekman & Friesen                 | Angry= happy     | 2        | 2000               | Detect identity present/ absent | Hits, false alarm rate, $d'$ , RT | No effect of word valence for happy faces, but negative intervening word boosted angry face WM performance | Intervening a word valence categorization during maintenance        |
| Langeslag et al. (2009)[13]       | 29 | Angry, happy, neutral | Photograph /Ekman & Friesen                 | Angry= happy     | 1,3      | 2000               | Detect identity present/ absent | Pr, Br, RT, P1, N170, P3b, N250r  | Angry > neutral; happy > neutral                                                                           |                                                                     |

| Study <sup>a</sup>             | N  | Expression              | Stimulus type/<br>Stimulus set <sup>b</sup> | Stimulus arousal           | Set size | Encoding time (ms)          | Task <sup>d</sup>               | Behavior /Neural index | Results <sup>e</sup>                                                              | Comments                                                                                               |
|--------------------------------|----|-------------------------|---------------------------------------------|----------------------------|----------|-----------------------------|---------------------------------|------------------------|-----------------------------------------------------------------------------------|--------------------------------------------------------------------------------------------------------|
| Lee and Cho (2019)[20]: Exp. 1 | 32 | Fearful, happy, neutral | Photograph /KUFEC                           | Feaful: 4.2<br>Happy: 4.46 | 4        | 1200                        | Detect identity same/ different | <i>d'</i>              | Fearful, neutral group > happy, neutral group; fearful > neutral; happy > neutral | Half of participants performed fearful and neutral faces, while half performed happy and neutral faces |
| Lee and Cho (2019)[20]: Exp. 2 | 32 | Fearful, happy, neutral | Photograph /KUFEC                           | Feaful: 4.2<br>Happy: 4.46 | 4        | 1200 (300 ms for each face) | Detect identity same/ different | <i>d'</i>              | Fearful, neutral group > happy, neutral group; fearful > neutral                  | Memory array stimuli presented sequentially                                                            |
| Lee and Cho (2019)[20]: Exp. 3 | 32 | Fearful, happy, neutral | Photograph /KUFEC                           | Feaful: 4.2<br>Happy: 4.46 | 4        | 1200 (300 ms for each face) | Detect identity same/ different | <i>d'</i>              | Fearful, neutral group = happy, neutral group; fearful > neutral                  | Memory array stimuli presented sequentially and a blank interval of 300 ms appeared between images     |

| Study <sup>a</sup>               | N  | Expression                          | Stimulus type/<br>Stimulus set <sup>b</sup>             | Stimulus arousal                                                      | Set size | Encoding time (ms) | Task <sup>d</sup>               | Behavior /Neural index                            | Results <sup>e</sup>                                      | Comments                                                                                                                              |
|----------------------------------|----|-------------------------------------|---------------------------------------------------------|-----------------------------------------------------------------------|----------|--------------------|---------------------------------|---------------------------------------------------|-----------------------------------------------------------|---------------------------------------------------------------------------------------------------------------------------------------|
| Linden et al. (2011)[21]: Exp. 1 | 20 | Angry, happy, neutral, sad, fearful | Photograph /Ekman & Friesen                             | Angry, fearful higher than all other condition, sad & happy > neutral | 2        | 2000               | Detect identity present/ absent | $d'$                                              | Angry > fearful;<br>happy > fearful;<br>neutral > fearful | Also test 20 melancholic depression and 20 non-melancholic depression participants, and sad face benefits showed in melancholic group |
| Liu et al. (2020)[14]            | 38 | Happy, sad                          | Photograph /Chinese facial expression of emotion system | Happy = sad                                                           | 2        | 2000               | Detect identity present/ absent | Hits, CR, FA, RTs, $d'$ N170, VPP, N250, P3b, LPP | Happy > sad                                               |                                                                                                                                       |



| <b>Study <sup>a</sup></b>      | <b>N</b> | <b>Expression</b>              | <b>Stimulus type/<br/>Stimulus set <sup>b</sup></b> | <b>Stimulus arousal</b>              | <b>Set size</b> | <b>Encoding time (ms)</b> | <b>Task <sup>d</sup></b>        | <b>Behavior /Neural index</b> | <b>Results <sup>e</sup></b>                                                                                                                                             | <b>Comments</b>                                 |
|--------------------------------|----------|--------------------------------|-----------------------------------------------------|--------------------------------------|-----------------|---------------------------|---------------------------------|-------------------------------|-------------------------------------------------------------------------------------------------------------------------------------------------------------------------|-------------------------------------------------|
| Maran et al. (2015)[22]: Exp.1 | 24       | Angry, happy, anxious, neutral | Photograph /NimStim                                 | No difference in perceived intensity | 4               | 2000                      | Detect identity present/ absent | <i>d'</i>                     | Neutral arousing condition: angry > happy; angry > anxious; angry > neutral; happy > anxious. Negative arousing condition: equalized VWM performance for all expression | Under unpleasant/neutral affect emotional state |

| Study <sup>a</sup>                | N  | Expression                        | Stimulus type/<br>Stimulus set <sup>b</sup> | Stimulus arousal                     | Set size | Encoding time (ms) | Task <sup>d</sup>                            | Behavior /Neural index                    | Results <sup>e</sup>                                                                                                                                   | Comments                                      |
|-----------------------------------|----|-----------------------------------|---------------------------------------------|--------------------------------------|----------|--------------------|----------------------------------------------|-------------------------------------------|--------------------------------------------------------------------------------------------------------------------------------------------------------|-----------------------------------------------|
| Maran et al. (2015)[22]: Exp.2    | 30 | Angry, happy, anxious, neutral    | Photograph /NimStim                         | No difference in perceived intensity | 4        | 2000               | Detect identity present/ absent              | $d'$                                      | Neutral arousing condition: angry > happy; angry > anxious; angry > neutral. Positive arousing condition: equalized VWM performance for all expression | Under pleasant/neutral affect emotional state |
| Sessa et al. (2011)[23]           | 28 | Fearful, neutral                  | Photograph /Ekman & Friesen, KDEF           | -                                    | 2,4      | 200                | Detect identity same/ different              | $d'$ , K, $K_{it}$ , RT, CDA              | Fearful > neutral                                                                                                                                      |                                               |
| Sessa et al. (2018)[24]           | 29 | Neutral, subtle angry, full angry | Photograph /KDEF                            | Morphed from neutral to full angry   | 2        | 500                | Detect expression same/ different            | Mean proportion of correct responses, CDA | Full angry > neutral > subtle angry                                                                                                                    |                                               |
| Simione et al. (2014)[25]: Exp. 1 | 19 | Angry, happy, neutral             | Schematic face                              | -                                    | 4        | 150/400            | Report the expression at the probed location | Acc                                       | Emotion > neutral, but no difference between angry and happy                                                                                           |                                               |

| <b>Study <sup>a</sup></b>         | <b>N</b> | <b>Expression</b>                                        | <b>Stimulus type/<br/>Stimulus set <sup>b</sup></b> | <b>Stimulus arousal</b> | <b>Set size</b> | <b>Encoding time (ms)</b> | <b>Task <sup>d</sup></b>                     | <b>Behavior /Neural index</b>                   | <b>Results <sup>e</sup></b>                                             | <b>Comments</b>                                             |
|-----------------------------------|----------|----------------------------------------------------------|-----------------------------------------------------|-------------------------|-----------------|---------------------------|----------------------------------------------|-------------------------------------------------|-------------------------------------------------------------------------|-------------------------------------------------------------|
| Simione et al. (2014)[25]: Exp. 2 | 20       | Angry, happy, neutral                                    | Schematic face                                      | -                       | 3,5             | 150                       | Report the expression at the probed location | Acc                                             | Angry > neutral; angry > happy                                          |                                                             |
| Spotorno et al.(2018)[26]: Exp. 1 | 48       | Angry, happy                                             | Photograph /Radboud                                 | -                       | 1,2,3,4         | 1500 ×set size            | Drag the face to the original location       | Acc, precision, swap error, oculomotor activity | Happy > angry                                                           |                                                             |
| Spotorno et al.(2018)[26]: Exp. 2 | 48       | Angry, happy                                             | Photograph /Radboud database                        | -                       | 4               | 6000                      | Drag the face to the original location       | Acc, precision, swap error, oculomotor activity | Happy > angry                                                           | Test the effect of the maintenance time                     |
| Švegar et al. (2013)[27]          | 24       | Afraid, angry, disgusted, happy, neutral, sad, surprised | Photograph /AKDEF, KDEF                             | -                       | 6               | 2000                      | Detect expression same/different             | Percentage of correct answers; RT               | Happy > all the other emotions while no difference among other emotions |                                                             |
| Thomas et al. (2014)[28]: Exp. 1  | 25       | Angry, happy, neutral                                    | Photograph /Ekman & Friesen                         | -                       | 4               | 2000                      | Detect identity present/absent               | <i>d'</i> , RT                                  | Angry > happy                                                           | Compare the uniform memory array and singleton memory array |

| <b>Study <sup>a</sup></b>        | <b>N</b> | <b>Expression</b>                                                    | <b>Stimulus type/<br/>Stimulus set <sup>b</sup></b> | <b>Stimulus arousal</b> | <b>Set size</b> | <b>Encoding time (ms)</b> | <b>Task <sup>d</sup></b>        | <b>Behavior /Neural index</b> | <b>Results <sup>e</sup></b>                                                                               | <b>Comments</b>                                                                                                                               |
|----------------------------------|----------|----------------------------------------------------------------------|-----------------------------------------------------|-------------------------|-----------------|---------------------------|---------------------------------|-------------------------------|-----------------------------------------------------------------------------------------------------------|-----------------------------------------------------------------------------------------------------------------------------------------------|
| Thomas et al. (2014)[28]: Exp. 2 | 32       | Angry, happy, neutral                                                | Photograph /Ekman & Friesen                         | -                       | 4               | 2000                      | Detect identity present/ absent | $d'$ , RT, eye movement       | Angry > happy                                                                                             | The procedure was same as the singleton condition in Exp.1, but they also monitored the eye movement here and verbal suppression was omitted. |
| Xie et al. (2017)[29]: Exp. 1    | 60       | Positive set (5 happy + 1 neutral); negative set (5 sad + 1 neutral) | Schematic face                                      | Positive = negative     | 4               | 500                       | Localize the changed face       | K                             | Positive = negative; K (neutral color) > K (emotional face); higher WM capacity maintain more happy faces | WM capacity measured by color                                                                                                                 |

| Study <sup>a</sup>            | N  | Expression                                                           | Stimulus type/<br>Stimulus set <sup>b</sup>             | Stimulus arousal    | Set size | Encoding time (ms) | Task <sup>d</sup>              | Behavior /Neural index                           | Results <sup>e</sup>                                                                                                     | Comments                                     |
|-------------------------------|----|----------------------------------------------------------------------|---------------------------------------------------------|---------------------|----------|--------------------|--------------------------------|--------------------------------------------------|--------------------------------------------------------------------------------------------------------------------------|----------------------------------------------|
| Xie et al. (2017)[29]: Exp. 2 | 42 | Positive set (5 happy + 1 neutral); negative set (5 sad + 1 neutral) | Schematic face                                          | Positive = negative | 4        | 500                | Localize the changed face      | K                                                | Positive = negative; K (emotional face) > K (neutral line drawing symbols); higher WM capacity maintain more happy faces | WM capacity measured by line-drawing symbols |
| Zhou et al. (2021)[30]        | 31 | Happy, sad                                                           | Photograph /Chinese facial expression of emotion system | Happy = sad         | 2        | 2000               | Detect identity present/absent | Hits, CR, FA, RTs, <i>d'</i> N170, VPP, P3b, LPP | Happy = sad                                                                                                              | Depressed group: sad > happy                 |

### Abbreviations:

Column 1 (Study): Exp., Experiment

Column 2 (N): N, participants numbers

Column 9 (Behavior/Neural index): Acc, accuracy; RT, reaction time; *d'*, VWM performance index,  $d' = Z(\text{hit rate}) - Z(\text{false alarm rate})$ ; K, VWM capacity index,  $K = \text{set size} \times (\text{hit rate} - \text{false alarm rate})$ ; fMRI, functional magnetic resonance imaging; K-iterative (Kit), calculated by an iterative procedure, please see details in Jackson et al. [7]; Pr, discrimination index,  $\text{Pr} = \text{hit rate} - \text{false alarm rate}$ ; Br, response bias index,  $\text{Br} = \text{false alarm rate} / (1 - \text{Pr})$ , Please see more details for Pr and Br in Langeslag et al. [13]; CR, correct rejections; CDA, contralateral delay activity, also known as sustained posterior contralateral negativity, SPCN, neural index of VWM maintenance.

Column 11 (Comments): rSTS, right superior temporal sulcus; rPFC, right prefrontal cortex; IFS, inferior frontal sulcus; rGPI, right globus pallidus internus  
a. The missing experiment here is due to the sub-experiment unrelated to the change detection paradigm or the main topic of this review, e.g., Experiment 2 in Becker et al. [15] is more related to race than emotional processing; Experiment 4 in Jackson et al. [7] is a discrimination task; Experiment 2 and 3 in Linden et al. [21] are emotional classification task and arousal/valance rating task, respectively.

b. We listed here both the stimulus material types (photograph or schematic face) and the stimulus set of photographs for a better comparison between different stimulus databases. The main database used in previous studies included: Ekman & Friesen set [31]; KDEF, Karolinska Directed Emotional Faces database

[32], AKDEF, Averaged Karolinska Directed Emotional Faces [33]; NimStim database [34]; CVL Face Database [35]; Radboud Face Database [36]; KUFEC, Korea University Facial Expression Collection [37]; Chinese facial expression of emotion system [38].

c. "-" means the information was not reported in the relevant publications.

d. Here we classified the tasks into four types based on what the researchers reported in relevant studies: 1) detect identity present/absent, 2) detect identity same/different, 3) detect expression same/different; 4) detect probe same/different. "Present/absent" refers to studies using multiple stimuli in the encoding array, with only one single stimulus in the central of the probe array, and the main task of the participant was to report whether or not the single probe was presented in the memory array; "Same/different" refers to studies using multiple stimuli (or single stimulus in the probe array but the face present in one of the locations from the study array rather than central space) both in the memory array and the probe array, and participants needed to indicate whether the probe array was identical to the memory array or whether one of the faces had changed. "Detect identity" refers to the expression irrelative to the study, and participants only needed to detect whether the identity had changed, whereas "Detect expression" meant that the participants needed to detect whether the expression on the probe array was identical to the memory array while the identity stayed unchanged or needed to be ignored. Additionally, "Detect probe" refers to the relevant study that did not emphasize detecting the expression or the identity but required participants to determine whether the whole probe face (both identity and expression) was identical to the memory items. In addition, a few studies have used a similar but not the classical change detection task, we decided to include those studies here for a better comparison. For those studies, we have only presented the specific tasks reported in the relevant studies without placing them in any of the above categories.

e. Only the main and most consistent results are reported here. ">" refers to the bias toward the former expression compared to the latter one; "<" refers to the bias toward the latter expression compared to the former one; "=" refers to no significant difference between the two expressions.

## Reference:

- [1] A.M. Treisman, G. Gelade, A feature-integration theory of attention., *Cogn. Psychol.* 12 (1980) 97–136. [https://doi.org/10.1016/0010-0285\(80\)90005-5](https://doi.org/10.1016/0010-0285(80)90005-5).
- [2] A. Frischen, J.D. Eastwood, D. Smilek, Visual search for faces with emotional expressions., *Psychol. Bull.* 134 (2008) 662–676. <https://doi.org/10.1037/0033-2909.134.5.662>.
- [3] S.J. Luck, S.A. Hillyard, Electrophysiological correlates of feature analysis during visual search, *Psychophysiology.* 31 (1994) 291–308.
- [4] S.J. Luck, Electrophysiological Correlates of the Focusing of Attention within Complex Visual Scenes: N2pc and Related ERP Components, *Oxford Handb. Event-Related Potential Components.* (2012). <https://doi.org/10.1093/oxfordhb/9780195374148.013.0161>.
- [5] T. Feldmann-Wüstefeld, M. Schmidt-Daffy, A. Schubö, Neural evidence for the threat detection advantage: Differential attention allocation to angry and happy faces, *Psychophysiology.* 48 (2011) 697–707. <https://doi.org/10.1111/j.1469-8986.2010.01130.x>.
- [6] S. Schindler, F. Bublatzky, Attention and emotion: An integrative review of emotional face processing as a function of attention, *Cortex.* (2020) 1–25. <https://doi.org/10.1016/j.cortex.2020.06.010>.
- [7] M.C. Jackson, C.Y. Wu, D.E.J. Linden, J.E. Raymond, Enhanced Visual Short-Term Memory for Angry Faces, *J. Exp. Psychol. Hum. Percept. Perform.* 35 (2009) 363–374. <https://doi.org/10.1037/a0013895>.
- [8] K.M. Curby, S.D. Smith, D. Moerel, A. Dyson, The cost of facing fear: Visual working memory is impaired for faces expressing fear, *Br. J. Psychol.* 110 (2019) 428–448. <https://doi.org/10.1111/bjop.12324>.
- [9] N. Cowan, The magical number 4 in short-term memory: A reconsideration of mental storage capacity *Behavioral and Brain Sciences, Behav. Brain Sci.* 24 (2001) 87–114.
- [10] P. Wilken, W.J. Ma, A detection theory account of change detection, *J. Vis.* 4 (2004) 1120–1135. <https://doi.org/10.1167/4.12.11>.
- [11] E.K. Vogel, M.G. Machizawa, Neural activity predicts individual differences in visual working memory capacity, *Nature.* 428 (2004) 748–751. <https://doi.org/10.1038/nature02447>.
- [12] R. Luria, H. Balaban, E. Awh, E.K. Vogel, The contralateral delay activity as a neural measure of visual working memory, *Neurosci. Biobehav. Rev.* 62 (2016) 100–108. <https://doi.org/10.1016/j.neubiorev.2016.01.003>.
- [13] S.J.E. Langeslag, H.M. Morgan, M.C. Jackson, D.E.J. Linden, J.W. Van Strien, Electrophysiological correlates of improved short-term memory for emotional faces, *Neuropsychologia.* 47 (2009) 887–896. <https://doi.org/10.1016/j.neuropsychologia.2008.12.024>.
- [14] M. Liu, L. Zhou, X. Wang, B. Ye, Sad expressions during encoding attenuate recognition of facial identity in visual working memory: behavioural and electrophysiological evidence, *Cogn. Emot.* 0 (2020) 1–13. <https://doi.org/10.1080/02699931.2020.1726291>.
- [15] D.V. Becker, C.R. Mortensen, U.S. Anderson, T. Sasaki, Out of sight but not out of mind: Memory scanning is attuned to threatening faces, *Evol. Psychol.* 12 (2014) 901–912. <https://doi.org/10.1177/147470491401200504>.
- [16] C.A. Brenner, S.P. Rumak, A.M.N. Burns, P.D. Kieffaber, The role of encoding and attention in facial emotion memory: An EEG investigation, *Int. J. Psychophysiol.* 93 (2014) 398–410.

- <https://doi.org/10.1016/j.ijpsycho.2014.06.006>.
- [17] M.C. Jackson, C. Wolf, S.J. Johnston, J.E. Raymond, D.E.J. Linden, Neural correlates of enhanced visual short-term memory for angry faces: An fMRI study, *PLoS One*. 3 (2008). <https://doi.org/10.1371/journal.pone.0003536>.
- [18] M.C. Jackson, D.E.J. Linden, J.E. Raymond, “Distracters” do not always distract: Visual working memory for angry faces is enhanced by incidental emotional words, *Front. Psychol.* 3 (2012) 1–9. <https://doi.org/10.3389/fpsyg.2012.00437>.
- [19] M.C. Jackson, D.E.J. Linden, J.E. Raymond, Angry expressions strengthen the encoding and maintenance of face identity representations in visual working memory, *Cogn. Emot.* 28 (2014) 278–297. <https://doi.org/10.1080/02699931.2013.816655>.
- [20] H.J. Lee, Y.S. Cho, Memory facilitation for emotional faces: Visual working memory trade-offs resulting from attentional preference for emotional facial expressions, *Mem. Cogn.* 47 (2019) 1231–1243. <https://doi.org/10.3758/s13421-019-00930-8>.
- [21] S.C. Linden, M.C. Jackson, L. Subramanian, D. Healy, D.E.J. Linden, Sad benefit in face working memory: An emotional bias of melancholic depression, *J. Affect. Disord.* 135 (2011) 251–257. <https://doi.org/10.1016/j.jad.2011.08.002>.
- [22] T. Maran, P. Sachse, M. Furtner, From specificity to sensitivity: Affective states modulate visual working memory for emotional expressive faces, *Front. Psychol.* 6 (2015) 1–16. <https://doi.org/10.3389/fpsyg.2015.01297>.
- [23] P. Sessa, R. Luria, A. Gotler, P. Jolicœur, R. Dell’acqua, Interhemispheric ERP asymmetries over inferior parietal cortex reveal differential visual working memory maintenance for fearful versus neutral facial identities, *Psychophysiology*. 48 (2011) 187–197. <https://doi.org/10.1111/j.1469-8986.2010.01046.x>.
- [24] P. Sessa, A.S. Lomoriello, R. Luria, Neural measures of the causal role of observers’ facial mimicry on visual working memory for facial expressions, *Soc. Cogn. Affect. Neurosci.* 13 (2018) 1281–1291. <https://doi.org/10.1093/scan/nsy095>.
- [25] L. Simione, L. Calabrese, F.S. Marucci, M.O. Belardinelli, A. Raffone, F.A. Maratos, Emotion based attentional priority for storage in visual short-term memory, *PLoS One*. 9 (2014). <https://doi.org/10.1371/journal.pone.0095261>.
- [26] S. Spotorno, M. Evans, M.C. Jackson, Remembering who was where: A happy expression advantage for face identity-location binding in working memory, *J. Exp. Psychol. Learn. Mem. Cogn.* 44 (2018) 1365–1383. <https://doi.org/10.1037/xlm0000522>.
- [27] D. Švegar, I. Kardum, M. Polič, Happy face superiority effect in change detection paradigm, *Psihol. Teme*. 22 (2013) 249–269.
- [28] P.M.J. Thomas, M.C. Jackson, J.E. Raymond, A threatening face in the crowd: Effects of emotional singletons on visual working memory, *J. Exp. Psychol. Hum. Percept. Perform.* 40 (2014) 253–263. <https://doi.org/10.1037/a0033970>.
- [29] W. Xie, H. Li, X. Ying, S. Zhu, R. Fu, Y. Zou, Y. Cui, Affective bias in visual working memory is associated with capacity, *Cogn. Emot.* 31 (2017) 1345–1360. <https://doi.org/10.1080/02699931.2016.1223020>.
- [30] L. Zhou, M. Liu, B. Ye, X. Wang, Q. Liu, Sad expressions during encoding enhance facial identity recognition in visual working memory in depression: Behavioural and electrophysiological evidence, *J. Affect. Disord.* 279 (2021)



- 630–639. <https://doi.org/10.1016/j.jad.2020.10.050>.
- [31] P. Ekman and W. V. Friesen, Measuring facial movement, *Environmental Psychology and Nonverbal Behavior*, vol. 1, no. 1, pp. 56–75, 1976.
- [32] D. Lundqvist, A. Flykt, and A. Öhman, The Karolinska directed emotional faces (KDEF), CD ROM from Department of Clinical Neuroscience, Psychology section, Karolinska Institutet, 1998.
- [33] D. Lundqvist, J.E. Litton, The Averaged Karolinska Directed Emotional Faces – AKDEF, CD ROM from Department of Clinical Neuroscience, Psychology section, Karolinska Institute, 1998.
- [34] N. Tottenham, J.W. Tanaka, A.C. Leon, T. McCarry, M. Nurse, T. a. Hare, D.J. Marcus, A. Westerlund, B.J. Casey, C. Nelson, The NimStim set of facial expressions: Judgements from untrained research participants, *Psychiatry Res.* 168 (2009) 242–249. <https://doi.org/10.1016/j.psychres.2008.05.006>.
- [35] F. Solina, P. Peer, B. Batagelj, S. Juvan, J. Kovac Color-based face detection in the 15 seconds of fame art installation Proceedings of Mirage INRIA Rocquencourt France (2003), p. 38 -47  
[http://web.mit.edu/emeyers/www/face\\_databases.html](http://web.mit.edu/emeyers/www/face_databases.html)
- [36] O. Langner, R. Dotsch, G. Bijlstra, D.H.J. Wigboldus, S.T. Hawk, A.D. Van Knippenberg, Presentation and validation of the Radboud Faces Database, *Cogn. Emot.* 24 (2010) 1377–1388.
- [37] M.W. Kim, J.S. Choi, Y.S. Cho, The Korea University Facial Expression Collection (KUFEC) and semantic differential ratings of emotion, *Korean J Psychol Gen.* 30 (2011) 1189–2111.
- [38] M. Liu, W. Hou, C. Yu, The Initial Establishment of Chinese Facial Expression of Emotion System used in Research of Emotional Disorder, *Psychol. Explor.* (2012) 8.
